# 1           **Fragmentation Through Polymerization (FTP): A New Method to** 2                           **Fragment DNA for Next-Generation Sequencing**

3  
4   **Konstantin B. Ignatov<sup>1,2\*</sup>, Konstantin A. Blagodatskikh<sup>3,4</sup>, Dmitry S. Shcherbo<sup>4</sup>, Tatiana V.**  
5   **Kramarova<sup>5</sup>, Yulia A. Monakhova<sup>1,6</sup> and Vladimir M. Kramarov<sup>1,2</sup>**

6  
7   <sup>1</sup>*All-Russia Institute of Agricultural Biotechnology, Russian Academy of Sciences, Moscow, Russia*

8   <sup>2</sup>*Vavilov Institute of General Genetics, Russian Academy of Sciences, Moscow, Russia*

9   <sup>3</sup>*Evrogen JSC, Moscow, Russia*

10   <sup>4</sup>*Pirogov Russian National Research Medical University, Moscow, Russia*

11   <sup>5</sup>*The Department of Molecular Biosciences, The Wenner-Gren Institute, Stockholm University,*  
12   *Stockholm, Sweden*

13   <sup>6</sup>*Syntol JSC, Moscow, Russia*

14  
15   \* Corresponding author

16   E-mail: [ignatovkb@bk.ru](mailto:ignatovkb@bk.ru)

17  
18   **Keywords: Next Generation Sequencing (NGS), DNA fragmentation, Fragmentation Through**  
19   **Polymerization (FTP), strand-displacement, SD DNA polymerase**

## 20 **Abstract**

21 Fragmentation of DNA is the first and very important step in preparing nucleic acids for NGS.  
22 Here we report a novel Fragmentation Through Polymerization (FTP) technique, which is simple,  
23 robust and low-cost enzymatic method of fragmentation. This method generates double-stranded  
24 DNA fragments that are suitable for the direct use in NGS library construction, and allows to  
25 eliminate the need of an additional step of reparation of DNA ends.

## 27 **Introduction**

28 Next Generation Sequencing (NGS) has become one of the major and widely used techniques  
29 in genomic research and genetic diagnostics. Fragmentation of DNA is the first main step in  
30 preparing sequencing library for NGS. The well-known NGS technologies, like Illumina or Ion  
31 Torrent, generate a plethora of reads with lengths under 600 - 1000 bases. The quality of NGS is  
32 largely dependent on the quality of the DNA fragmentation, thus making this step utterly critical in  
33 the process of library construction.

34 There are three main approaches to shorten long DNA for the library preparation: physical (by  
35 using acoustic sonication or by hydrodynamic shearing), enzymatic (based on the usage of  
36 endonucleases or Transposase) and chemical shearing (utilizing hydrolyze of DNA at heating with  
37 divalent metal cations) [1, 2].

38 Acoustic shearing with Covaris ultrasonicators (Covaris, Woburn, MA, USA) is currently the  
39 gold standard for fragmentation at random nucleotide locations for a NGS library construction, but  
40 it requires a significant upfront capital investment and can be financially inaccessible for many  
41 laboratories [3].

42 Enzymatic methods versus acoustic shearing have a similar efficiency and do not need  
43 expensive equipment [2]. Commercially available Fragmentase (New England Biolabs, Ipswich  
44 MA, USA) and Nextera tagmentation (Illumina, San Diego, CA, USA) are the most popular  
45 enzymatic techniques. Nextera uses a transposase to simultaneously fragment and insert adapters  
46 onto dsDNA [4]. Fragmentase contains two enzymes: one randomly nicks dsDNA and the other  
47 cuts the strand opposite to the nicks [2].

48 DNA fragments obtained by physical fragmentation or by Fragmentase method require a  
49 reparation of DNA ends for the following ligation with adapters during NGS library construction [1,  
50 2]. To reduce a reparation stage and improve a protocol of NGS library generation, we have  
51 developed a new enzymatic method for DNA fragmentation: Fragmentation Through

52 Polymerization (FTP). Our FTP method is based on the use of two enzymes: non-specific  
53 endonuclease, which randomly nicks dsDNA (DNase I) and thermostable DNA polymerase with  
54 strong strand-displacement activity (SD DNA polymerase [5]). At the first stage of FTP DNase I  
55 introduces nicks into dsDNA, and at the second stage SD polymerase elongates 3'-ends of the nicks  
56 in a strand-displacement manner. As a result, FTP generates a number of double-stranded DNA  
57 fragments (Fig. 1) that are suitable for direct ligation with adapters (without a reparation of the  
58 ends).

59

60 **Fig 1. General overview of dsDNA Fragmentation Through Polymerization (FTP)**  
61 **method.** FTP method is based on two enzymatic reactions: a DNA nicking with DNase I and  
62 strand-displacement DNA polymerization with SD DNA polymerase. As a result, a number of  
63 double-stranded DNA fragments with overlapping sequences are generated. *De novo* synthesized  
64 DNA is indicated in grey, and SD polymerase is indicated in red.

65

66 Here we describe the detailed FTP method of DNA fragmentation and compare it with the  
67 well-known and widely used Fragmentase technique (New England Biolabs). Systematic  
68 comparison of Fragmentase with other fragmentation methods has been described earlier [2].

69

## 70 **Materials and methods**

### 71 **Enzymes and reagents**

72 Lyophilized DNase I (deoxyribonuclease I from *Bovine pancreas*) was obtained from Sigma-  
73 Aldrich (St Louis, MO, USA) and solved in the storage buffer (50% glycerol, 100 mM NaCl, 0.2  
74 mg/ml BSA, 1 mM EDTA, 0.2 mM DTT, 20 mM Tris-HCl, pH=8.0) up to 1 mg/ml.

75 SD DNA polymerase (50 U/ $\mu$ l) and the reaction buffer were supplied by Bioron GmbH,  
76 (Ludwigshafen, Germany). *E.coli* BL21(DE3) gDNA was supplied by Evrogen JSC (Moscow,  
77 Russia). dNTPs were obtained from Bioline Limited (London, GB).

78 NEBNext dsDNA Fragmentase and NEBNext Ultra II DNA Library Prep kit were supplied by  
79 New England Biolabs, Inc. (Ipswich, MA, USA).

80

### 81 **dsDNA Fragmentation Through Polymerization (FTP)**

82 For fragmentation, 200 ng gDNA of *E.coli* strain BL21(DE3) was added to the reaction  
83 mixture: 1X reaction buffer for SD polymerase (Bioron GmbH), 3.5 mM MgCl<sub>2</sub>, dNTPs 0.25 mM  
84 (each), DNase I 1.5 ng/μl, SD DNA polymerase 1.5 U/μl. The total volume of the reaction was 25  
85 μl. The reaction mixture was completed at 4°C (wet ice). The fragmentation of gDNA was carried  
86 out by two-step incubation: 20 minutes at 30°C and then 20 minutes at 70°C. For incubation we  
87 used thermal cycler with heated lid. The reaction was stopped by cooling down to 10°C. The  
88 mixture was diluted 1:1 with sterile water and fragmented DNA was purified with SPRI beads.

89

#### 90 **DNA Fragmentation with NEBNext dsDNA Fragmentase**

91 gDNA of *E.coli* strain BL21(DE3) was digested by using NEBNext dsDNA Fragmentase  
92 (New England Biolabs, Inc.), following the manufacturer's protocol. Briefly, 200 ng of gDNA were  
93 added to the reaction mixture (total volume 25 μl): 1X Fragmentase Reaction Buffer v2, 10 mM  
94 MgCl, and 1X dsDNA Fragmentase. The mixture was incubated at 37°C for 20 minutes. The  
95 digestion was stopped by adding EDTA up to 100 mM. The mixture was diluted 1:1 with sterile  
96 water and fragmented DNA was purified with SPRI beads.

97

#### 98 **Preparation of NGS libraries**

99 We prepared four NGS libraries from four different samples of Fragmentase-digested gDNA  
100 and four NGS libraries from four different samples of FTP-digested gDNA. NGS libraries were  
101 generated using NEBNext Ultra II DNA Library Prep kit (New England Biolabs, Inc.) according to  
102 the manufacturer's instruction. The conventional procedure for Fragmentase digested DNA  
103 included: repair of DNA ends with "NEBNext Ultra II End Prep Enzyme Mix", addition of adapters  
104 to the DNA fragments by "NEBNext Ultra II Ligation Master Mix" and amplification of the  
105 adaptor-ligated DNA fragments with "NEBNext Ultra II Q5 Master Mix". Input amount of each  
106 DNA sample was 200 ng. The library indexing and amplification were performed for 5 PCR cycles  
107 as described in the kit's manual.

108 NGS libraries from FTP digested gDNA were constructed by NEBNext Ultra II DNA Library  
109 Prep Kit procedure, but with the exception of DNA end reparation stage.

110 After the amplification stage, all libraries were quantified with Quant-iT PicoGreen dsDNA  
111 Assay Kit (Molecular Probes, Inc., Eugene, OR, USA), pooled (500 ng of each) and purified with  
112 AMPure XP beads.

113

## 114 **Next Generation Sequencing (NGS) and bioinformatic analysis**

115 The pooled libraries were sequenced on the Illumina MiSeq Instrument (Illumina, California,  
116 USA) with a 300 cycles MiSeq Sequencing Kit v2, paired-end mode, resulting in  $12 \times 10^6$  reads.  
117 Each of the reads was ~150 nt long. The FASTQ files generated on the instrument were uploaded to  
118 NCBI SRArchive under project ID: PRJNA509202.

119 The FASTQ files were quality controlled using FASTQC v0.11.4 (Babraham bioinformatics,  
120 Cambridge, UK). PHRED scores were calculated by FASTQC v0.11.4. Adapters were trimmed  
121 with FLEXBAR v.2.5 [6]. Filtered reads with a minimum length of 30 bp were subsequently  
122 aligned to the *E.coli* BL21(DE3) genome (NCBI Reference Sequence: NC\_012971.2 ) using  
123 BOWTIE2 software v2.3.4 [7]. Random samples of reads were generated using Seqtk software  
124 (<https://github.com/lh3/seqtk>). *De novo* assembly of contigs was carried out with SPAdes tool  
125 v3.10.1 (<http://cab.spbu.ru/software/spades/>). Statistics were calculated using QUAST software v5  
126 [8, 9] (<http://quast.sourceforge.net/>).

127

## 128 **Results and discussion**

### 129 **Digestion of gDNA by Fragmentation Through Polymerization (FTP) method**

130 We compared two enzymatic methods of dsDNA fragmentation for NGS library construction:  
131 digestion with Fragmentase from New England Biolabs and Fragmentation Through Polymerization  
132 (FTP). FTP method consists of two consequent enzymatic reactions: random DNA nicking and  
133 elongation in a strand-displacement manner of the 3'-ends of nicked DNA. As a result, a number of

134 double-stranded DNA fragments with overlapping sequences are generated. The general overview  
135 of FTP method is outlined in Figure 1.

136 We carried out FTP in one-tube format as described in the “Materials and methods”.

137 Mesophilic DNase I and thermophilic SD DNA polymerase were added to the reaction mixture that  
138 contained gDNA of *E. coli* strain BL21(DE3). The reaction was incubated at 30°C for 20 minutes,  
139 plus additional 20 minutes at 70°C. DNase I has the optimum performance temperature between  
140 30°C and 40°C. During the first stage of incubation at 30°C, DNase I introduced nicks into the  
141 dsDNA. In order to optimize an average size of the obtained fragments we tested different DNase I  
142 concentrations and/or incubation times (results are not shown). During the second stage, the DNase  
143 I was heat-inactivated and the SD polymerase was activated by increasing the reaction temperature  
144 up to 70°C. The SD polymerase is the Taq DNA polymerase mutant that has a strong strand  
145 displacement activity and high thermostability (up to 93°C) with optimum of enzymatic activity at  
146 70-75°C [5]. These properties of SD DNA polymerase, in combination with the robust polymerase  
147 activity, make it very suitable for the application in FTP technique. In summary, DNase I generated  
148 3'-ends by nicking dsDNA at 30°C, followed by SD polymerase that used these ends for strand  
149 displacement DNA polymerization at 70°C and subsequently disjointed dsDNA fragments. As a  
150 result, the fragments with an average size about 500 bp (in a range 150 – 1500 bp) were obtained  
151 from the intact gDNA. Agarose-gel electrophoresis of gDNA fragmented by FTP is demonstrated in  
152 Figure 2. As it is seen, a cooperative work of DNase I and SD polymerase is required for the perfect  
153 DNA fragmentation (Fig. 2, lanes 4, 5).

154

155 **Fig 2. Agarose-gel electrophoresis of gDNA fragmented by FTP method.** gDNA of *E. coli*  
156 BL21 was incubated as described in the “Materials and Methods”: without enzymes (lane 1), with  
157 SD polymerase (lane 2 ), with DNase I (lane 3), and with both DNase I and SD polymerase (lane 4,  
158 5). **M1** – 1 kb DNA Ladder; **M2** – 100 bp DNA Ladder.

159

160 Fragmentase and other methods of fragmentation (with the exception of Illumina's Nextera  
161 tagmentation) generate DNA fragments by introducing nicks and counter nicks in DNA strands that  
162 disassociate at 8-12 nucleotides downstream or upstream from the nick site. Thus, the generated  
163 fragments need a repair of DNA ends for the following NGS library construction [1, 2]. Unlike in  
164 other methods, in FTP the DNA fragments are separated by strand-displacement DNA  
165 polymerization and not by counter nicks (Fig. 2 demonstrates that SD polymerase is required for the  
166 fragment disassociation). As a result of FTP, double-stranded DNA fragments have ends that are  
167 suitable for direct NGS library construction and an additional step of DNA ends reparation is no  
168 longer necessary.

169

#### 170 **NGS library constructions from Fragmentase and FTP digested gDNA**

171 Two techniques, FTP and standard Fragmentase, were used to digest the gDNA of *E. coli*  
172 strain BL21(DE3). The fragmented DNA samples were then used for the construction of NGS  
173 libraries with NEBNext Ultra II DNA Library Prep Kit from New England Biolabs. Four libraries  
174 were prepared from the DNA samples digested with Fragmentase by the standard protocol, which  
175 included the stage of DNA end repair.

176 Another four libraries were prepared using the same NEBNext kit, but the DNA samples for  
177 these libraries were generated by FTP method, without the stage of DNA reparation. It is worth  
178 noting that when the DNA fragments are obtained by physical fragmentation or by Fragmentase  
179 method, the reparation of the DNA ends is required for the library construction [1, 2]. The FTP  
180 method does not require this step, therefore, the procedure of NGS library preparation is more  
181 simple.

182 The DNA amount in each library was quantified with Quant-iT PicoGreen dsDNA Assay Kit.  
183 All libraries generated with both Fragmentase and FTP method contained similar amounts of ds  
184 DNA, about 800 ng. This result shows that the efficiency of NGS libraries generation with FTP  
185 method is comparable to the efficiency of NGS library generation with Fragmentase technique.

186

187       **Assessment of NGS libraries generated from Fragmentase and FTP digested gDNA by**  
188 **Next Generation Sequencing**

189       The obtained NGS libraries of gDNA *E.coli* BL21(DE3) were sequenced at 48× depth with an  
190 Illumina MiSeq Instrument. The raw data (about 220 Mb for each DNA sample) generated in this  
191 study have been deposited in the National Centre for Biotechnology Information (NCBI) Sequence  
192 Read Archive under BioProject accession number PRJNA509202  
193 (<https://www.ncbi.nlm.nih.gov/sra/PRJNA509202>).

194       Different fragmentation and NGS library preparation protocols could potentially affect quality  
195 of reads. We therefore estimated the quality of reads as described in [2] for comparison of different  
196 fragmentation methods. PHRED quality scores for each base provide a sequencing error estimate  
197 and are hence a good tool to assess the quality of sequences and to compare the reliability of  
198 different sequencing runs on the same instrument [10]. We did not detect any significant differences  
199 in the quality scores obtained from the Fragmentase and FTP NGS libraries (Fig. 3).

200

201       **Fig 3. Comparison of the sequence qualities scores (PHRED) at the 38-ends of the**  
202 **sequences that have been generated from the NGS libraries constructed with Fragmentase (red) and**  
203 **FTP (blue) methods of DNA fragmentation. No difference was found between the libraries.**

204

205       After NGS, the generated reads were subsequently aligned to the *E.coli* BL21(DE3) reference  
206 genome sequence (NCBI Ref Seq: NC\_012971.2). There are several key characteristics of NGS that  
207 depend on a quality of the library: genome coverage, identity with a reference sequence, the rate of  
208 errors and amount of unmappable sequences. These characteristics were estimated for different  
209 sequencing depths of the NGS libraries. For the simulation of different depth, random samples of  
210 NGS reads were generated. To compare the genome coverage (the total number of aligned bases in  
211 the reference, divided by the genome size) we used the genome sequence NCBI Ref Seq:  
212 NC\_012971.2 as the reference on the assumption this represented 100% coverage. Unmappable



213 sequences were calculated as a rate of unmappable reads. A large fraction of these reads reduces the  
214 efficiency and the apparent coverage of the genome sequencing. The rate of indels was estimated as  
215 the average number of single nucleotide insertions or deletions per 100,000 aligned bases, and the  
216 rate of mismatches as the average number of mismatches per 100,000 aligned bases. The resulting  
217 average data of NGS analysis are shown in Table 1. The statistics for Fragmentase and FTP NGS  
218 libraries were calculated from the data of the four independent libraries for the each fragmentation  
219 method. The detailed data for each NGS library are shown in Supporting information (S1 Table).  
220 The obtained characteristics were about the same for the assembled sequences from the libraries  
221 generated by different methods (Table 1).

222  
223

**Table 1. Key averaged NGS characteristics of Fragmentase and FTP generated libraries.**

| <b>Sequencing depth<br/>(numbers of reads)</b> | <b>Method of<br/>DNA<br/>fragmentation</b> | <b>Genome<br/>coverage (%)</b> | <b>Ref. Seq.<br/>identity (%)</b> | <b>Mismatch errors<br/>(per 100 kb)</b> | <b>Indel errors<br/>(per 100 kb)</b> | <b>Unmappable<br/>reads (%)</b> |
|------------------------------------------------|--------------------------------------------|--------------------------------|-----------------------------------|-----------------------------------------|--------------------------------------|---------------------------------|
| 32× depth<br>(10×10 <sup>5</sup> reads)        | Fragmentase                                | 98.226                         | 99.999                            | 1.01                                    | 0.24                                 | 3.07                            |
|                                                | FTP                                        | 98.224                         | 99.999                            | 1.02                                    | 0.14                                 | 3.91                            |
| 16× depth<br>(5×10 <sup>5</sup> reads)         | Fragmentase                                | 98.193                         | 99.999                            | 1.05                                    | 0.13                                 | 3.09                            |
|                                                | FTP                                        | 98.200                         | 99.999                            | 1.17                                    | 0.16                                 | 3.92                            |
| 8× depth<br>(2.5×10 <sup>5</sup> reads)        | Fragmentase                                | 98.042                         | 99.996                            | 3.70                                    | 0.22                                 | 3.17                            |
|                                                | FTP                                        | 98.068                         | 99.996                            | 4.02                                    | 0.24                                 | 3.90                            |
| 3× depth<br>(1×10 <sup>5</sup> reads)          | Fragmentase                                | 91.100                         | 99.974                            | 25.23                                   | 0.70                                 | 3.13                            |
|                                                | FTP                                        | 90.908                         | 99.971                            | 27.70                                   | 1.21                                 | 3.90                            |

224  
225  
226

The mean NGS statistics per library were calculated from the data of the four independent libraries for the each method. All metrics were obtained for different depths of *E.coli* BL21 genome sequencing. We found no significant differences between Fragmentase and FTP generated NGS libraries.

227 To evaluate the genome assembly *de novo* for Fragmentase and FTP libraries, we used  
228 QAST software (quality assessment tool for genome assemblies) [9]. We compared the following  
229 assembling metrics:

- 230 • Number of contigs: The total number of contigs in the assembly.
- 231 • Largest contig: The length of the largest contig in the assembly.
- 232 • Total length: The total number of bases in the assembly.
- 233 • N50 and N75: The contig length such that using equal or longer length contigs produces at  
234 least 50% and 75% (accordingly) of the bases of the assembly length [9, 11, 12].
- 235 • NG50 and NG75 (Genome N50/75): The contig length such that using equal or longer  
236 length contigs produces at least 50% and 75% (accordingly) of the length of the reference  
237 genome, rather than 50% and 75% of the assembly length [9, 11, 12].

238 The assembly metrics were calculated for different sequencing depths of the libraries obtained  
239 by Fragmentase and FTP methods. The mean statistics calculated from the data of the four  
240 independent libraries for the each fragmentation method are shown in Table 2. The metrics for each  
241 NGS library are shown in Supporting information (S2 Table). Our results demonstrate that the  
242 characteristics of the genome assembly of libraries obtained by the novel FTP method are similar to  
243 those obtained by the Fragmentase method (Table 2).

244

**Table 2. The averaged assembly metrics of the NGS libraries obtained by Fragmentase and FTP methods.**

| Sequencing depth (numbers of reads)  | Method of DNA fragmentation | Number of contigs | Largest contig (bp) | Total length (bp) | N50   | NG50  | N75   | NG75  |
|--------------------------------------|-----------------------------|-------------------|---------------------|-------------------|-------|-------|-------|-------|
| 32× depth (10×10 <sup>5</sup> reads) | Fragmentase                 | 182               | 272230              | 4485104           | 81481 | 80813 | 41851 | 40741 |
|                                      | FTP                         | 195               | 265892              | 4484951           | 81981 | 80479 | 43990 | 41542 |
| 16× depth (5×10 <sup>5</sup> reads)  | Fragmentase                 | 204               | 217222              | 4483651           | 69766 | 69259 | 37530 | 36159 |
|                                      | FTP                         | 196               | 194626              | 4484098           | 70654 | 69018 | 39773 | 39008 |
| 8× depth (2.5×10 <sup>5</sup> reads) | Fragmentase                 | 304               | 134506              | 4478279           | 45010 | 44221 | 26078 | 24944 |
|                                      | FTP                         | 274               | 133551              | 4479908           | 41368 | 40106 | 21611 | 19769 |
| 3× depth (1×10 <sup>5</sup> reads)   | Fragmentase                 | 2414              | 14250               | 4178082           | 2886  | 2689  | 1753  | 1476  |
|                                      | FTP                         | 2500              | 15256               | 4178040           | 2666  | 2456  | 1628  | 1348  |

245

246

The mean assembly statistics were calculated from the data of the four independent libraries for the each method and for the different depths of

247

*E.coli* BL21 genome sequencing.No significant differences between Fragmentase and FTP generated NGS libraries were found.

248           In summary, the Fragmentation Through Polymerization is a novel, robust and simple method  
249 of DNA fragmentation, which is suitable for NGS. It simplifies the procedure and reduces the price  
250 of NGS library preparation by eliminating the DNA end-repair stage from the protocol. Thus, the  
251 FTP method can become a helpful tool for NGS.

252

## 253           **Acknowledgments**

254           We thank Syntol JSC (Moscow, Russia), Evrogen JSC (Moscow, Russia) and Bioron GmbH  
255 (Ludwigshafen, Germany) for support of this project.

256 **References**

- 257 1. Head SR, Komori HK, LaMere SA, Whisenant T, Van Nieuwerburgh F, Salomon DR, et  
258 al. Library construction for next-generation sequencing: overviews and challenges. *BioTechniques*.  
259 2014;56: 61–64, 66, 68, passim. doi:10.2144/000114133
- 260 2. Knierim E, Lucke B, Schwarz JM, Schuelke M, Seelow D. Systematic comparison of three  
261 methods for fragmentation of long-range PCR products for next generation sequencing. *PLoS ONE*.  
262 2011;6: e28240. doi:10.1371/journal.pone.0028240
- 263 3. Kasoji SK, Pattenden SG, Malc EP, Jayakody CN, Tsuruta JK, Mieczkowski PA, et al.  
264 Cavitation Enhancing Nanodroplets Mediate Efficient DNA Fragmentation in a Bench Top  
265 Ultrasonic Water Bath. *PLoS ONE*. 2015;10: e0133014. doi:10.1371/journal.pone.0133014
- 266 4. Marine R, Polson SW, Ravel J, Hatfull G, Russell D, Sullivan M, et al. Evaluation of a  
267 transposase protocol for rapid generation of shotgun high-throughput sequencing libraries from  
268 nanogram quantities of DNA. *Appl Environ Microbiol*. 2011;77: 8071–8079.  
269 doi:10.1128/AEM.05610-11
- 270 5. Ignatov KB, Barsova EV, Fradkov AF, Blagodatskikh KA, Kramarova TV, Kramarov VM.  
271 A strong strand displacement activity of thermostable DNA polymerase markedly improves the  
272 results of DNA amplification. *BioTechniques*. 2014;57: 81–87. doi:10.2144/000114198
- 273 6. Dodt M, Roehr JT, Ahmed R, Dieterich C. FLEXBAR-Flexible Barcode and Adapter  
274 Processing for Next-Generation Sequencing Platforms. *Biology (Basel)*. 2012;1: 895–905.  
275 doi:10.3390/biology1030895
- 276 7. Langmead B, Salzberg SL. Fast gapped-read alignment with Bowtie 2. *Nat Methods*.  
277 2012;9: 357–359. doi:10.1038/nmeth.1923

- 278           8. Mikheenko A, Prjibelski A, Saveliev V, Antipov D, Gurevich A. Versatile genome  
279 assembly evaluation with QUASt-LG. *Bioinformatics*. 2018;34: i142–i150.  
280 doi:10.1093/bioinformatics/bty266
- 281           9. Gurevich A, Saveliev V, Vyahhi N, Tesler G. QUASt: quality assessment tool for genome  
282 assemblies. *Bioinformatics*. 2013;29: 1072–1075. doi:10.1093/bioinformatics/btt086
- 283           10. Richterich P. Estimation of errors in “raw” DNA sequences: a validation study. *Genome*  
284 *Res*. 1998;8: 251–259.
- 285           11. Earl D, Bradnam K, St John J, Darling A, Lin D, Fass J, et al. Assemblathon 1: a  
286 competitive assessment of de novo short read assembly methods. *Genome Res*. 2011;21: 2224–  
287 2241. doi:10.1101/gr.126599.111
- 288           12. Miller JR, Koren S, Sutton G. Assembly algorithms for next-generation sequencing data.  
289 *Genomics*. 2010;95: 315–327. doi:10.1016/j.ygeno.2010.03.001

290

291

292 **Supporting information**

293 **S1 Table. Key NGS characteristics of individual libraries generated by Fragmentase (A)**

294 **and FTP (B) methods.** All metrics were obtained for different depths of *E.coli* BL21 genome

295 sequencing.

296

297 **S2 Table. The assembly metrics of the individual NGS libraries obtained by**

298 **Fragmentase and FTP methods.** All metrics were obtained for different depths of *E.coli* BL21

299 genome sequencing.



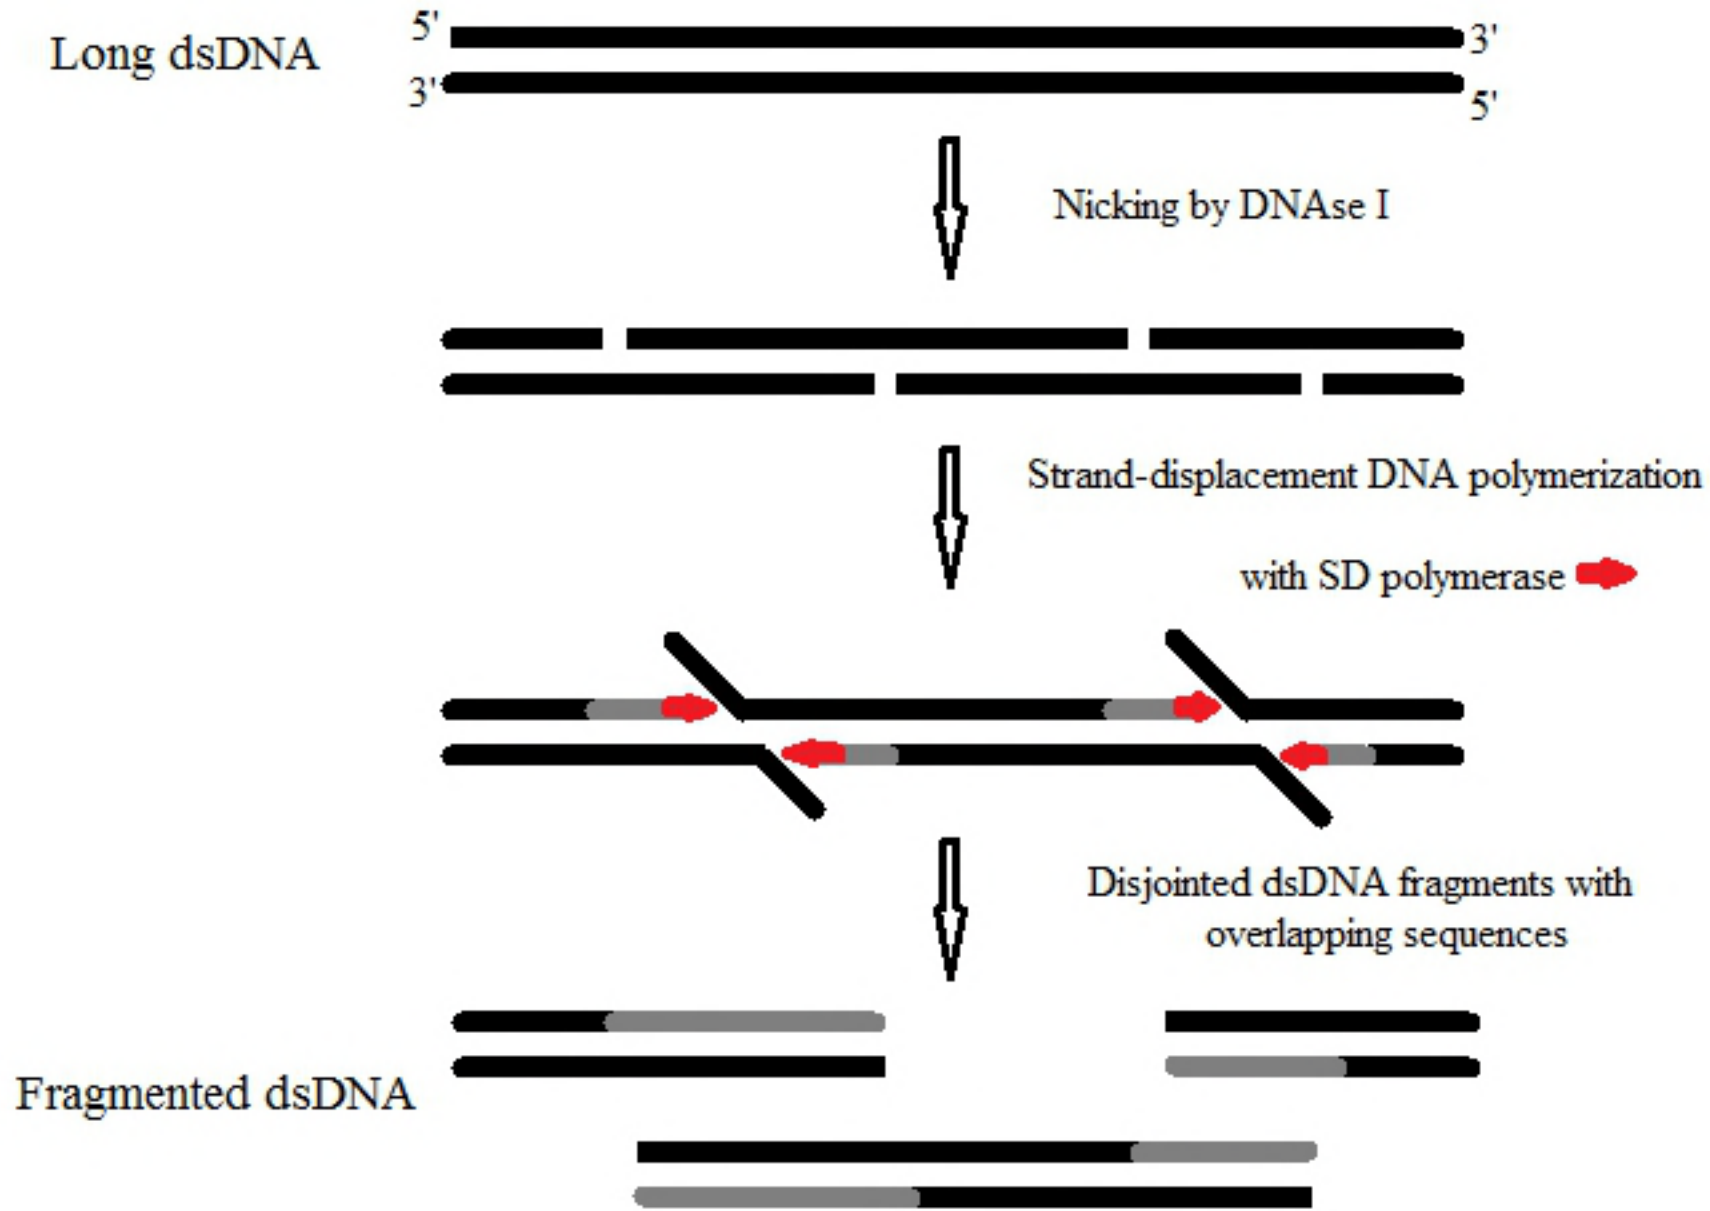

Figure 1

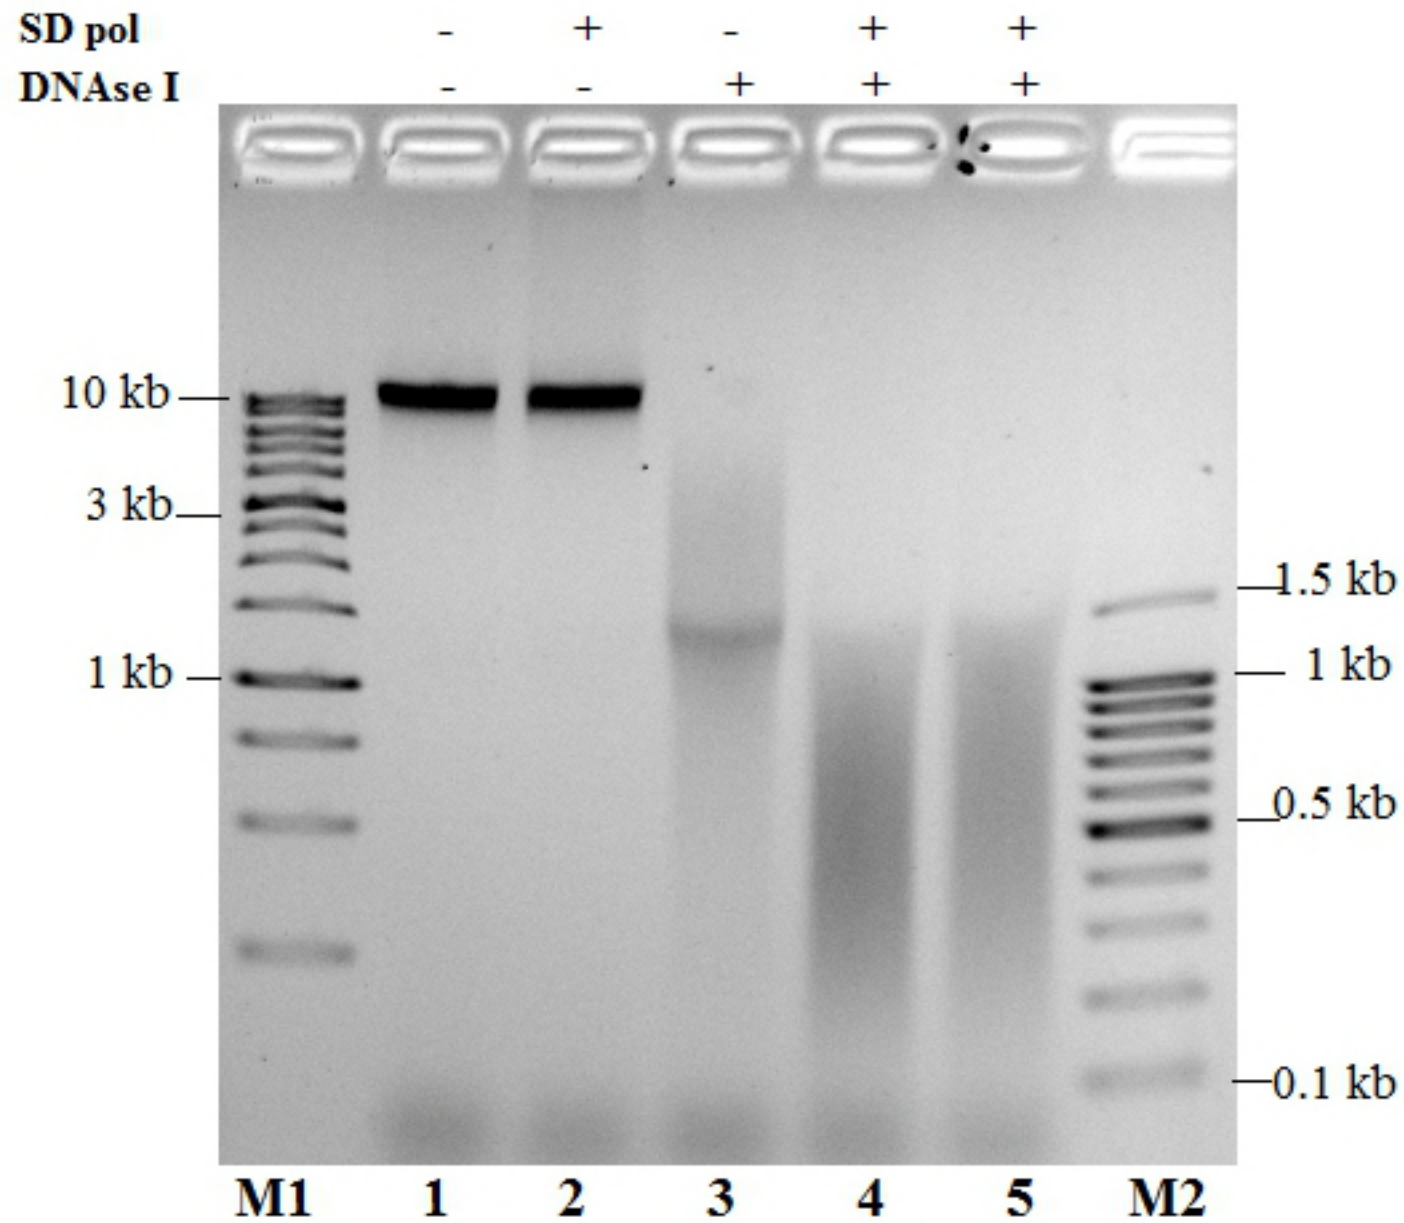

Figure 2

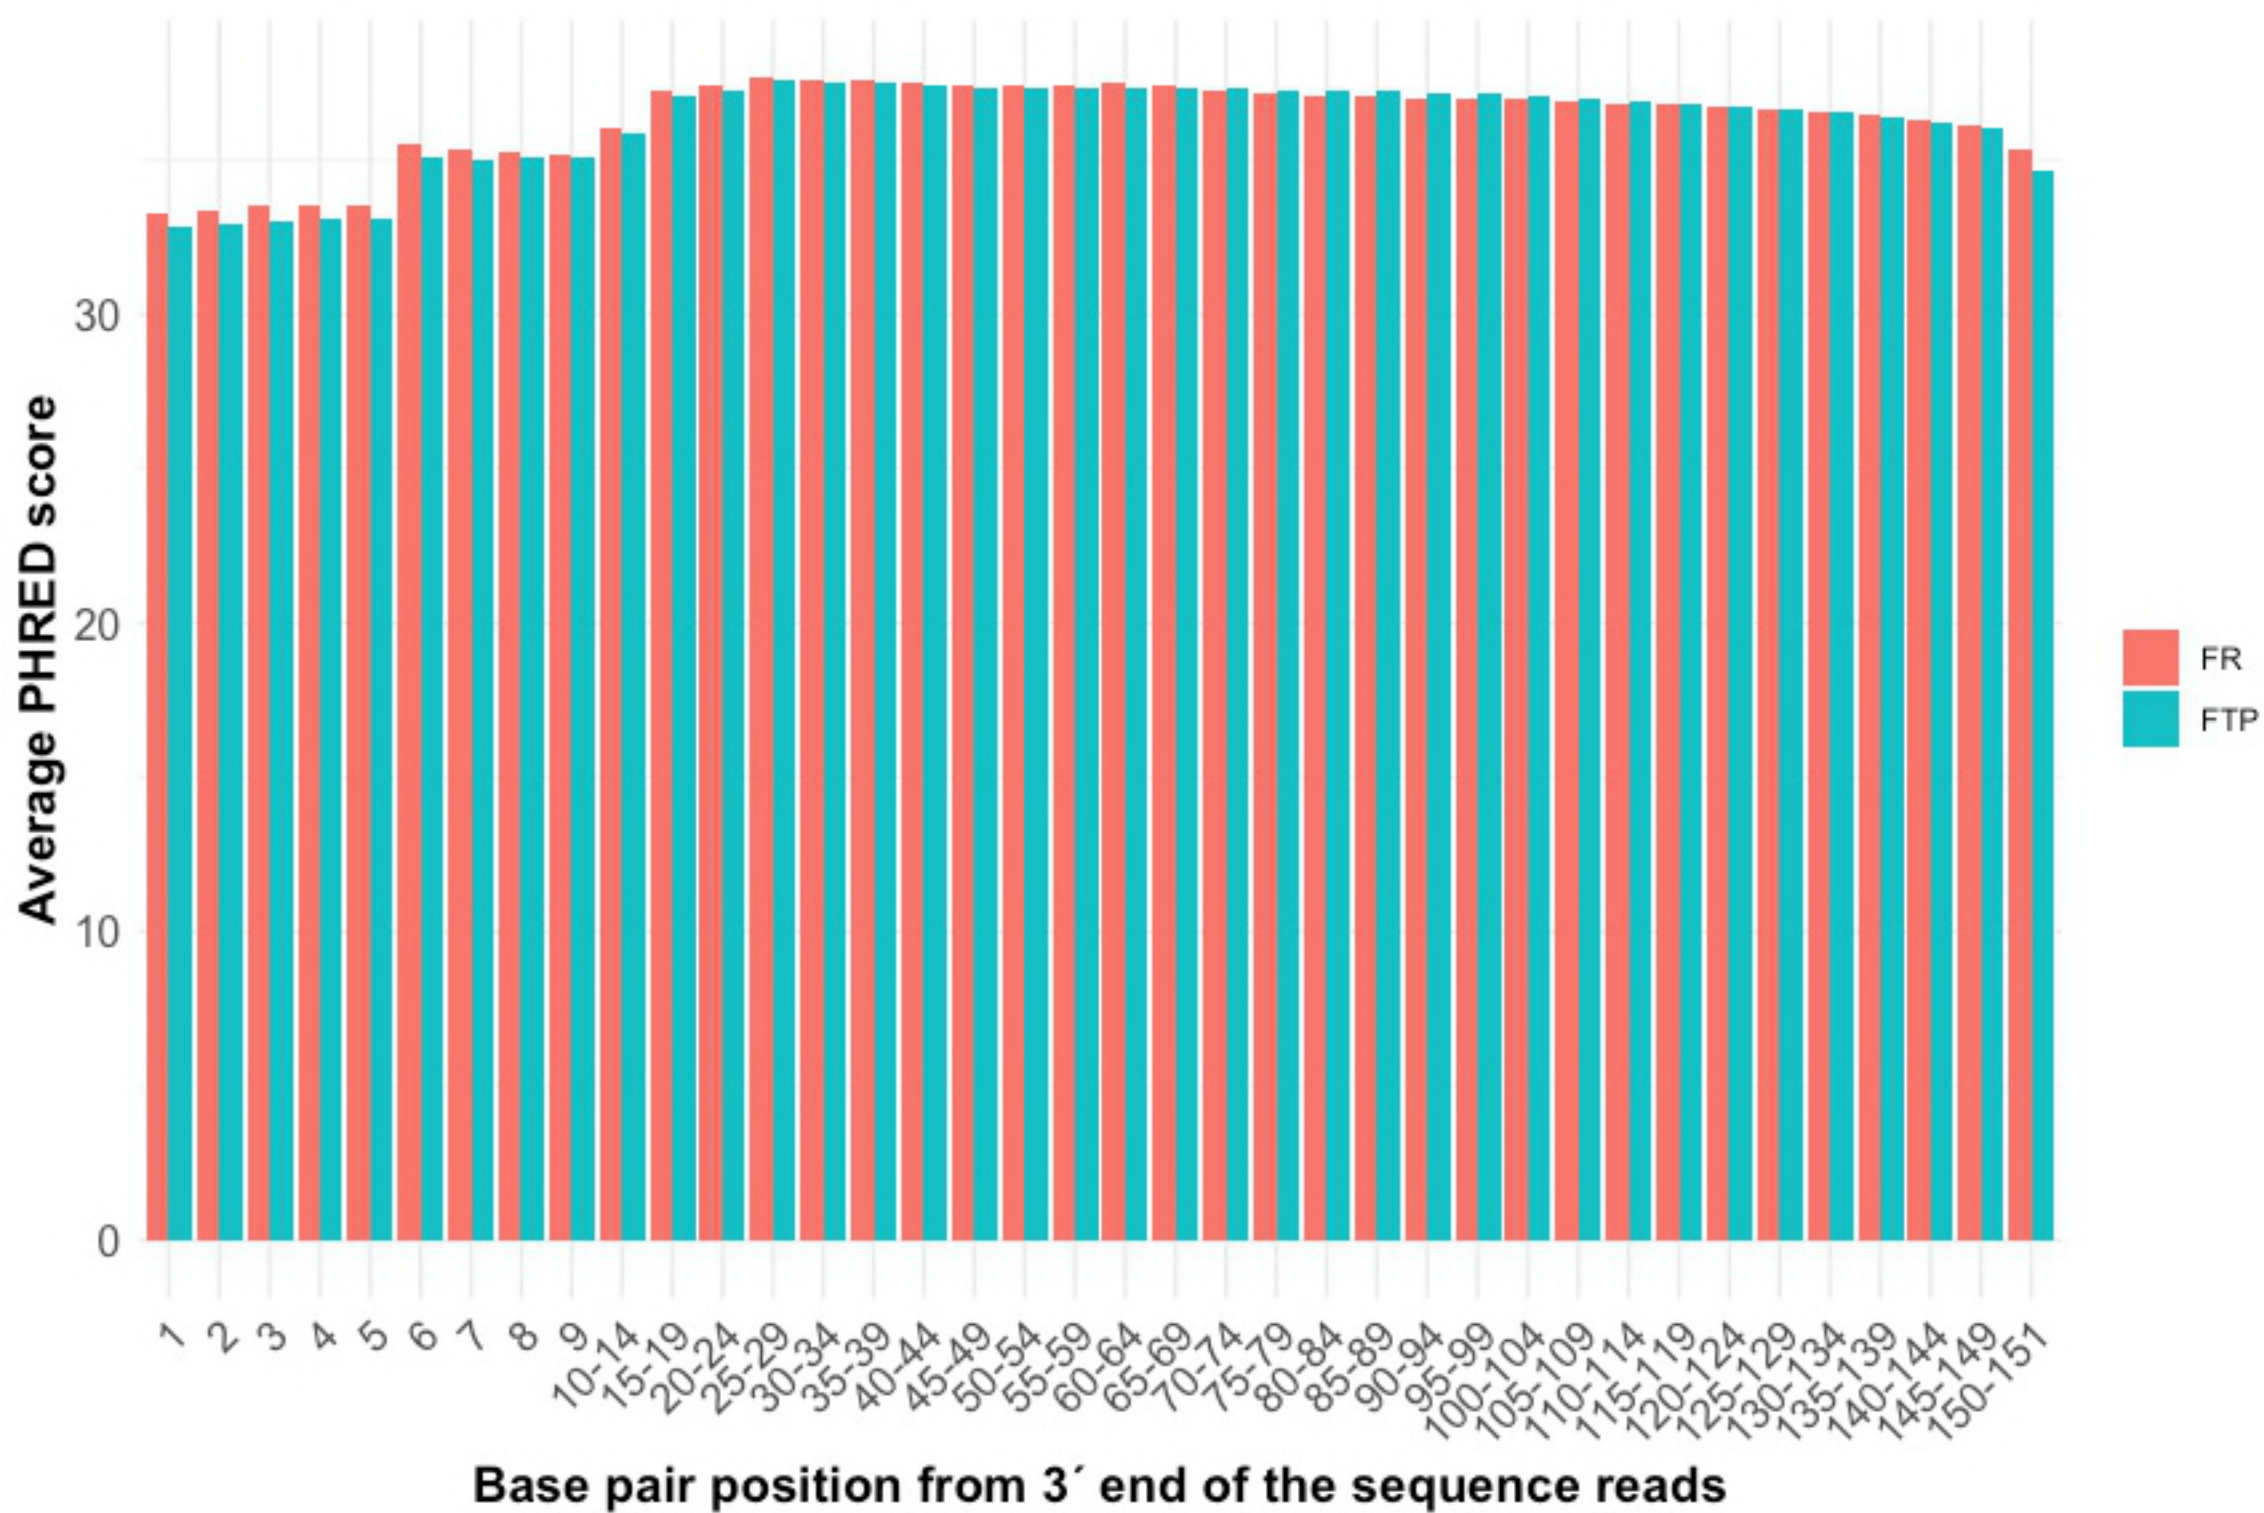

Figure 3
